# Supplementary material for: Assessment of the Prescribing Pharmacist’s Role in Supporting Access to Prescription-Only Medicines—Metadata Analysis in Poland
Source: MDPI journal article supplement (doi:10.3390/healthcare11243106), 2023-12-05
Supplement: s1 [file s1]

## Supplementary Information

### Assessment of prescribing pharmacists role in supporting the access to prescription-only medicines – metadata analysis in Poland

**Table S1.** Types of prescriptions in pharmaceutical prescribing in Poland that fall into the category of independent prescribing.

|                                    | <b>Prescription pro auctore/<br/>pro familiae</b>                                                                             | <b>Pharmaceutical prescription</b>                                                                                           |
|------------------------------------|-------------------------------------------------------------------------------------------------------------------------------|------------------------------------------------------------------------------------------------------------------------------|
| <b>Pharmacist authorized</b>       | any pharmacist with a license to practice pharmacist or pharmacist's family member (to the extent indicated in the law)       | pharmacist in a community pharmacy                                                                                           |
| <b>Eligible patient</b>            |                                                                                                                               | each patient                                                                                                                 |
| <b>How to issue a prescription</b> | in electronic form using the gabinet.gov.pl application, paper prescription                                                   | pharmacy system, in exceptional situations paper prescription                                                                |
| <b>Amount of drug prescribed</b>   | - in the case of an e-prescription for a maximum of 180 days of use according to the dosage indicated on the prescription     | - in the case of e-prescription for a maximum of 180 days of use according to the dosage indicated on the prescription       |
| <b>Type of drug</b>                | - in the case of a paper prescription, for a maximum of 120 days of use according to the dosage indicated on the prescription | - in the case of a paper prescription for a maximum of 120 days of use according to the dosage indicated on the prescription |
| <b>Type of drug</b>                | medicinal products with prescription availability category (Rx), excluding narcotic and psychotropic substances               | in the case of a paper prescription for a maximum of 120 days of use according to the dosage indicated on the prescription   |
| <b>Drug payment</b>                | for full payment or with reimbursement                                                                                        | for full payment                                                                                                             |
| <b>Prescription records</b>        | issuing pharmacist                                                                                                            | pharmacy                                                                                                                     |
| <b>Reason for issuance</b>         | - entered only in the pharmacist's records<br>- according to medical knowledge and the pharmacist's diagnosis                 | - placed on the prescription<br>- risk to patient's health and life                                                          |

**Table S2.** Impact of pharmaceutical prescribing in Poland taking into account the division of prescriptions into pharmaceutical prescription, *pro auctore*, and *pro familiae*, on the method of prescription writing (Electronic, Paper).

| <b>Tab S1 (Chi<sup>2</sup> =37853.91; df=2; p &lt; 0.00001.) - Summary Crosstabulation Frequency Table</b> |                   |               |                |
|------------------------------------------------------------------------------------------------------------|-------------------|---------------|----------------|
| <b>Year</b>                                                                                                | <b>Electronic</b> | <b>Paper</b>  | <b>Row</b>     |
| <b>Pro auctore</b>                                                                                         | 382524            | 9360          | 391884         |
| <i>Column %</i>                                                                                            | <i>12,85%</i>     | <i>51,17%</i> |                |
| <i>Row %</i>                                                                                               | <i>97,61%</i>     | <i>2,39%</i>  |                |
| <i>Total %</i>                                                                                             | <i>12,77%</i>     | <i>0,31%</i>  | <i>13,09%</i>  |
| <b>Pro familiae</b>                                                                                        | 408638            | 6949          | 415587         |
| <i>Column %</i>                                                                                            | <i>13,73%</i>     | <i>37,99%</i> |                |
| <i>Row %</i>                                                                                               | <i>98,33%</i>     | <i>1,67%</i>  |                |
| <i>Total %</i>                                                                                             | <i>13,65%</i>     | <i>0,23%</i>  | <i>13,88%</i>  |
| <b>Pharmaceutical prescription</b>                                                                         | 2185291           | 1984          | 2187275        |
| <i>Column %</i>                                                                                            | <i>73,42%</i>     | <i>10,85%</i> |                |
| <i>Row %</i>                                                                                               | <i>99,91%</i>     | <i>0,09%</i>  |                |
| <i>Total %</i>                                                                                             | <i>72,97%</i>     | <i>0,07%</i>  | <i>73,04%</i>  |
| Totals                                                                                                     | 2976453           | 18293         | 2994746        |
| <i>Total %</i>                                                                                             | <i>99,39%</i>     | <i>0,61%</i>  | <i>100,00%</i> |

**Table S3.** Number of prescriptions issued by pharmacists in Poland in the analyzed period by voivodeship.

| <b>Tab S2 - Frequency table</b>     |              |                |                              |
|-------------------------------------|--------------|----------------|------------------------------|
| <b>Voivodeship*</b>                 | <b>Count</b> | <b>Percent</b> | <b>Cumulative Percentage</b> |
| Lubusz (lubuskie)                   | 64743        | 2,16           | 2,16                         |
| Opole (opolskie)                    | 39557        | 1,32           | 3,48                         |
| Lesser Poland (małopolskie)         | 407584       | 13,61          | 17,09                        |
| Lodz (łódzkie)                      | 197315       | 6,59           | 23,68                        |
| Lublin (lubelskie)                  | 184018       | 6,14           | 29,83                        |
| Greater Poland (wielkopolskie)      | 484409       | 16,18          | 46,00                        |
| Swietokrzyskie (świętokrzyskie)     | 149556       | 4,99           | 51,00                        |
| Silesia (śląskie)                   | 395019       | 13,19          | 64,19                        |
| Masovia (mazowieckie)               | 310164       | 10,36          | 74,54                        |
| Podlaskie (podlaskie)               | 100338       | 3,35           | 77,89                        |
| Pomerania (pomorskie)               | 116881       | 3,90           | 81,80                        |
| Lower Silesian (dolnośląskie)       | 200345       | 6,69           | 88,49                        |
| West Pomerania (zachodniopomorskie) | 82253        | 2,75           | 91,23                        |

|                                       |        |      |        |
|---------------------------------------|--------|------|--------|
| Kuyavia-Pomerania(kujawsko-pomorskie) | 80920  | 2,70 | 93,93  |
| Subcarpathia (podkarpackie)           | 136607 | 4,56 | 98,50  |
| Warmia-Masuria (warmińsko-mazurskie)  | 44209  | 1,48 | 99,97  |
| Missing                               | 828    | 0,03 | 100,00 |
| Missing                               | 0      | 0,00 | 100,00 |

\* voivodeship code numer on figures 5 and 6: Lubusz (lubuskie) 04; Opole (opolskie) 08; Lesser Poland (małopolskie) 06; Lodz (łódzkie) 05; Lublin (lubelskie) 03; Greater Poland (wielkopolskie) 15; Swietokrzyskie (świętokrzyskie) 13; Silesia (śląskie) 12; Masovia (mazowieckie) 07; Podlaskie (podlaskie) 10; Pomerania (pomorskie) 11; Lower Silesian (dolnośląskie) 01; West Pomerania (zachodniopomorskie) 16; Kuyavia-Pomerania(kujawsko-pomorskie) 02; Subcarpathia (podkarpackie) 09; Warmia-Masuria (warmińsko-mazurskie) 14.

**Table S4.** List of the most frequently prescribed drug substances by pharmacists by ATC anatomical-therapeutic-chemical classification group code, the prescriptions of which accounted for more than 1% of all drugs prescribed during the 21-month period.

| Tab S3 - Frequency table |       |         |
|--------------------------|-------|---------|
| Category                 | Count | Percent |
| C07AB07                  | 94742 | 3,16    |
| H03AA01                  | 89709 | 3,00    |
| C07AB02                  | 53617 | 1,79    |
| C09AA05                  | 50811 | 1,70    |
| M01AB05                  | 48975 | 1,64    |
| A10BA02                  | 46256 | 1,54    |
| J01FA10                  | 44081 | 1,47    |
| A02BC02                  | 44034 | 1,47    |
| Missing                  | 35927 | 1,20    |
| G03AA12                  | 33752 | 1,13    |
| C07AB12                  | 33110 | 1,11    |
| C10AA07                  | 32887 | 1,10    |
| S01CA06                  | 31194 | 1,04    |

**Table S5.** Age analysis taking into account the gender of the pharmacist.

| Tab S4                       |         |       |                       |                       |        |         |         |          |
|------------------------------|---------|-------|-----------------------|-----------------------|--------|---------|---------|----------|
| Descriptive Statistics (Age) |         |       |                       |                       |        |         |         |          |
| Variable                     | Valid N | Mean  | Confidence: SR-95% CI | Confidence: SR+95% CI | Median | Minimum | Maximum | Std.Dev. |
| Age_(All)                    | 2990859 | 45,50 | 45,485                | 45,513                | 44,0   | 25,0    | 88,0    | 12,30    |
| Age_(Woman)                  | 2290289 | 46,15 | 46,131                | 46,164                | 44,0   | 25,0    | 88,0    | 12,54    |
| Age_(Man)                    | 700570  | 43,38 | 43,352                | 43,405                | 42,0   | 25,0    | 87,0    | 11,23    |

**Table S6.** Characteristics of pharmaceutical prescribing carried out with full payment and with reimbursement taking into account the age of the pharmacist.

| <b>Tab 14 (Chi<sup>2</sup> =1307.375; df=2; p &lt; 0.00001.) - Summary Crosstabulation Frequency Table</b> |                                        |                                       |            |
|------------------------------------------------------------------------------------------------------------|----------------------------------------|---------------------------------------|------------|
| <b>Age</b>                                                                                                 | <b>Prescription with reimbursement</b> | <b>Prescription with full payment</b> | <b>Row</b> |
| <b>Age ≤ 40</b>                                                                                            | 43141                                  | 1133225                               | 1176366    |
| Column %                                                                                                   | 44,89%                                 | 39,15%                                |            |
| Row %                                                                                                      | 3,67%                                  | 96,33%                                |            |
| Total %                                                                                                    | 1,44%                                  | 37,89%                                | 39,33%     |
| <b>40 &lt; Age ≤ 60</b>                                                                                    | 41001                                  | 1347916                               | 1388917    |
| Column %                                                                                                   | 42,66%                                 | 46,56%                                |            |
| Row %                                                                                                      | 2,95%                                  | 97,05%                                |            |
| Total %                                                                                                    | 1,37%                                  | 45,07%                                | 46,44%     |
| <b>Age &gt; 60</b>                                                                                         | 11958                                  | 413618                                | 425576     |
| Column %                                                                                                   | 12,44%                                 | 14,29%                                |            |
| Row %                                                                                                      | 2,81%                                  | 97,19%                                |            |
| Total %                                                                                                    | 0,40%                                  | 13,83%                                | 14,23%     |
| <b>Totals</b>                                                                                              | 96100                                  | 2894759                               | 2990859    |
| Total %                                                                                                    | 3,21%                                  | 96,79%                                | 100,00%    |

**Table S7.** Characteristics of pharmaceutical prescribing by share of *pro auctore* and *pro familiae* prescriptions vs. age of pharmacist.

| <b>Tab S6 (Chi<sup>2</sup> = 136799.7; df=4; p &lt; 0.00001.) - Summary Crosstabulation Frequency Table</b> |                    |                     |                                    |                   |
|-------------------------------------------------------------------------------------------------------------|--------------------|---------------------|------------------------------------|-------------------|
| <b>Age</b>                                                                                                  | <b>Pro auctore</b> | <b>Pro familiae</b> | <b>Pharmaceutical prescription</b> | <b>Row Totals</b> |
| <b>Age ≤ 40</b>                                                                                             | 207086             | 238488              | 730792                             | 1176366           |
| Column %                                                                                                    | 52,89%             | 57,46%              | 33,46%                             |                   |
| Row %                                                                                                       | 17,60%             | 20,27%              | 62,12%                             |                   |
| Total %                                                                                                     | 6,92%              | 7,97%               | 24,43%                             | 39,33%            |
| <b>40 &lt; Age ≤ 60</b>                                                                                     | 156691             | 153476              | 1078750                            | 1388917           |
| Column %                                                                                                    | 40,02%             | 36,98%              | 49,39%                             |                   |
| Row %                                                                                                       | 11,28%             | 11,05%              | 77,67%                             |                   |
| Total %                                                                                                     | 5,24%              | 5,13%               | 36,07%                             | 46,44%            |
| <b>Age &gt; 60</b>                                                                                          | 27766              | 23077               | 374733                             | 425576            |
| Column %                                                                                                    | 7,09%              | 5,56%               | 17,16%                             |                   |
| Row %                                                                                                       | 6,52%              | 5,42%               | 88,05%                             |                   |
| Total %                                                                                                     | 0,93%              | 0,77%               | 12,53%                             | 14,23%            |
| <b>Totals</b>                                                                                               | 391543             | 415041              | 2184275                            | 2990859           |
| Total %                                                                                                     | 13,09%             | 13,88%              | 73,03%                             | 100,00%           |

$N = 29497.012 + 67.6838 \cdot \text{Number of members}$ ;  $R = 0.7844$ ;  $p = 0.0003$

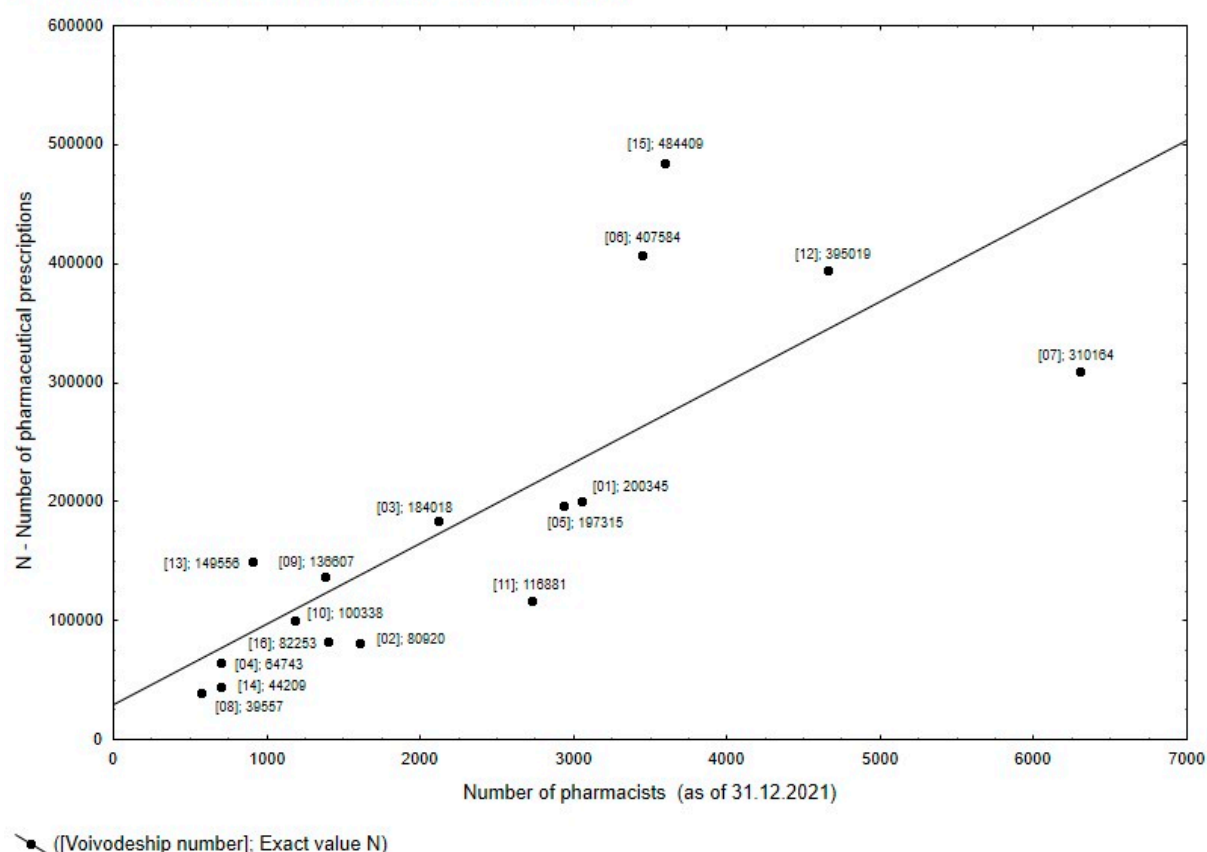

**Figure S1.** Pearson's linear correlation between the number of pharmacists in a voivodeship and the number of pharmaceutical prescriptions.

Correspondence Analysis - CA

2D Plot of Row and Column Coordinates; Dimension: 1 x 2 (Standardization: Row and column profiles)

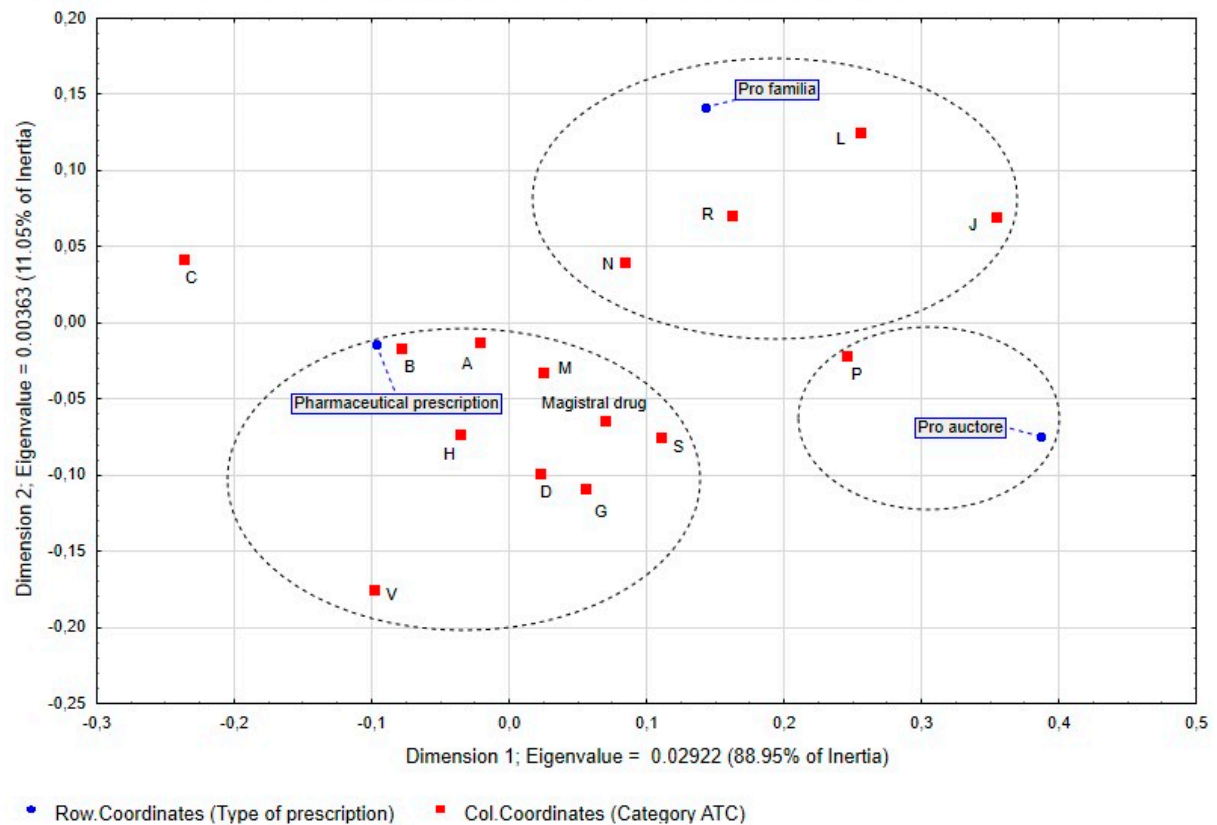

**Figure S2.** Correspondence Analysis (CA) for variables: Type of pharmaceutical prescription vs. ATC main group. 2D Plot of Row and Column Coordinates - *Dimension 1* vs. *Dimension 2*.

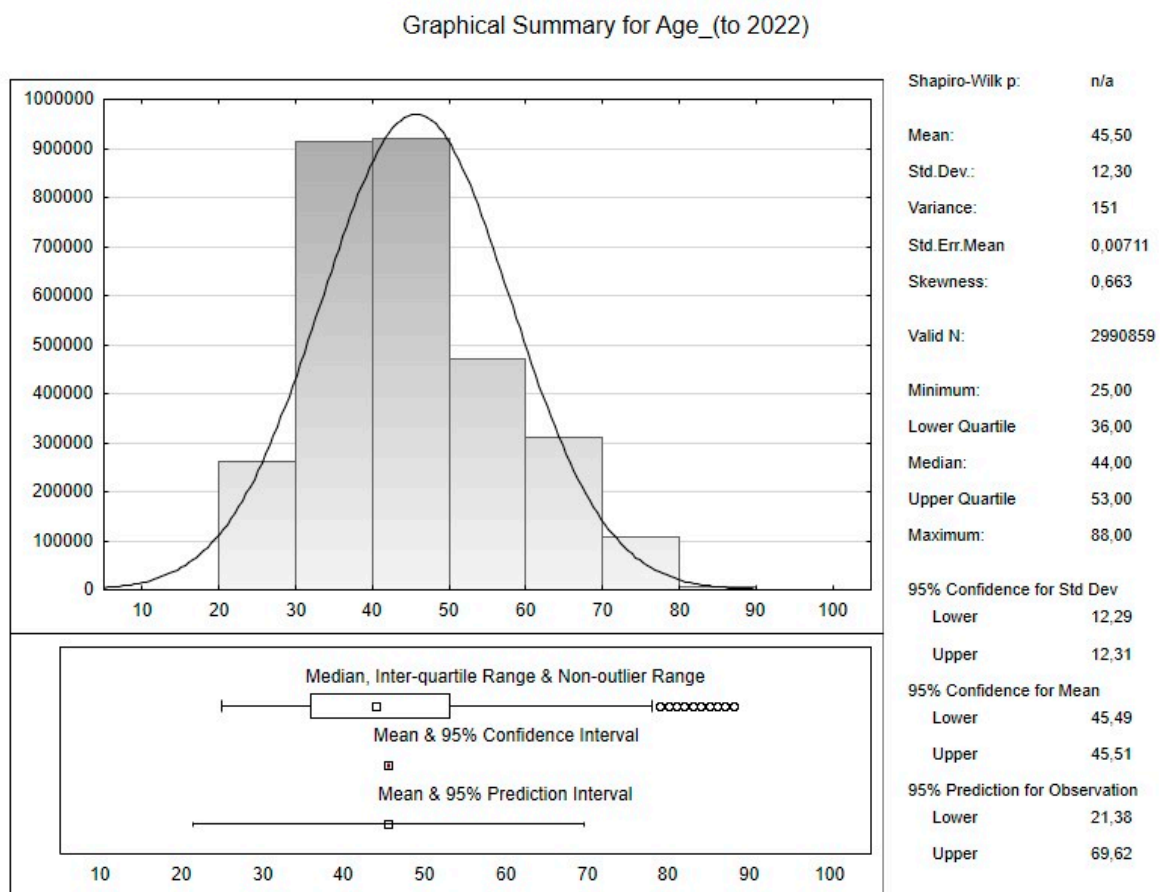

**Figure S3.** Basic descriptive statistics with histogram calculated for the variable: age of pharmacist who performed pharmaceutical prescribing.
